# Supplementary material for: Broadband photoresponse in plasmon-enhanced Ga-doped ZnO
Source: Royal Society of Chemistry journal article supplement (doi:10.1039/d3ma00017f), 2023-01-01
Supplement: d3ma00017f1.pdf [file d3ma00017f1.pdf]

## Electronic supplementary information

### Broadband Photoresponse in Plasmon-enhanced Ga-doped ZnO

Manli Yang,<sup>‡</sup> Xiaoliang Weng,<sup>‡</sup> Muhammad Ahsan Iqbal, Chenxu Kang, Su-Yun Zhang, Yu-Jia Zeng\*

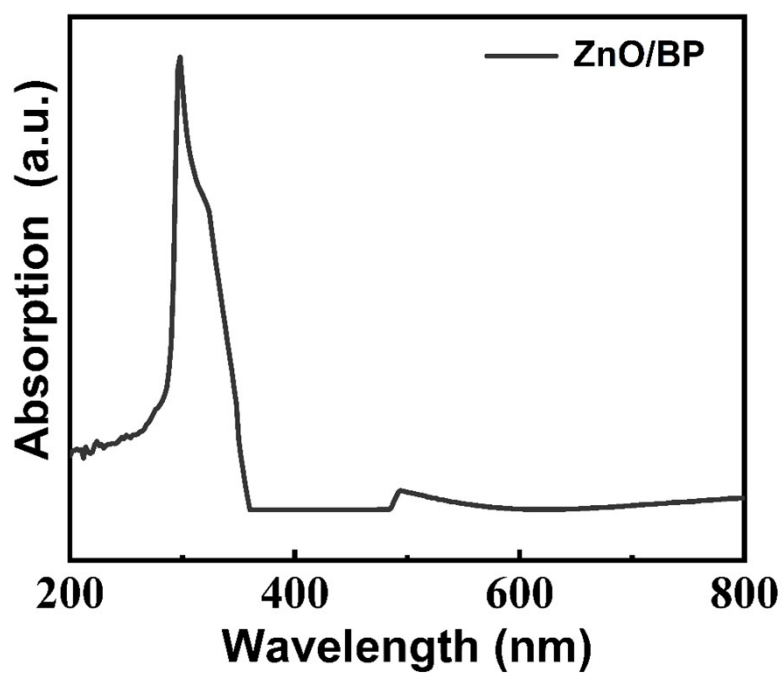

Figure S1. The absorption spectrum of ZnO/BP heterojunction.

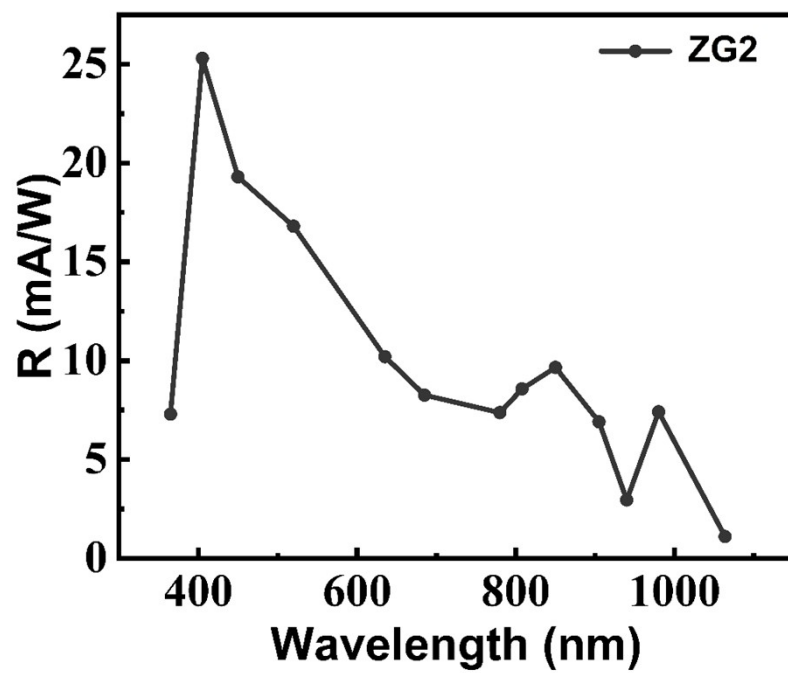

Figure S2. The wavelength-dependent responsivities of the ZG2 device

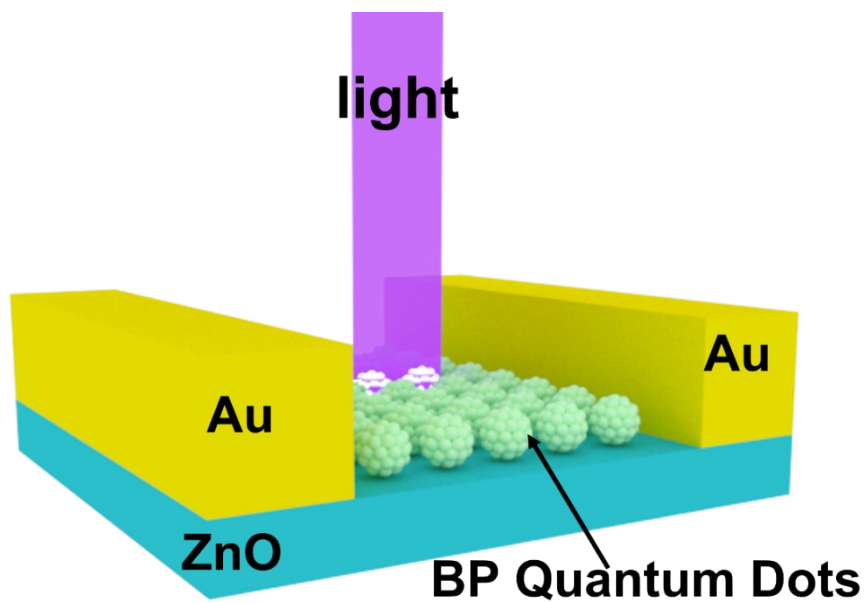

Figure S3. The schematic diagram of BZG heterojunction device.
